# Supplementary material
Source: PubMed Central journal article supplement (PMC4060813)
Supplement: Supp_Fig1.pdf [file Supp_Fig1.pdf]

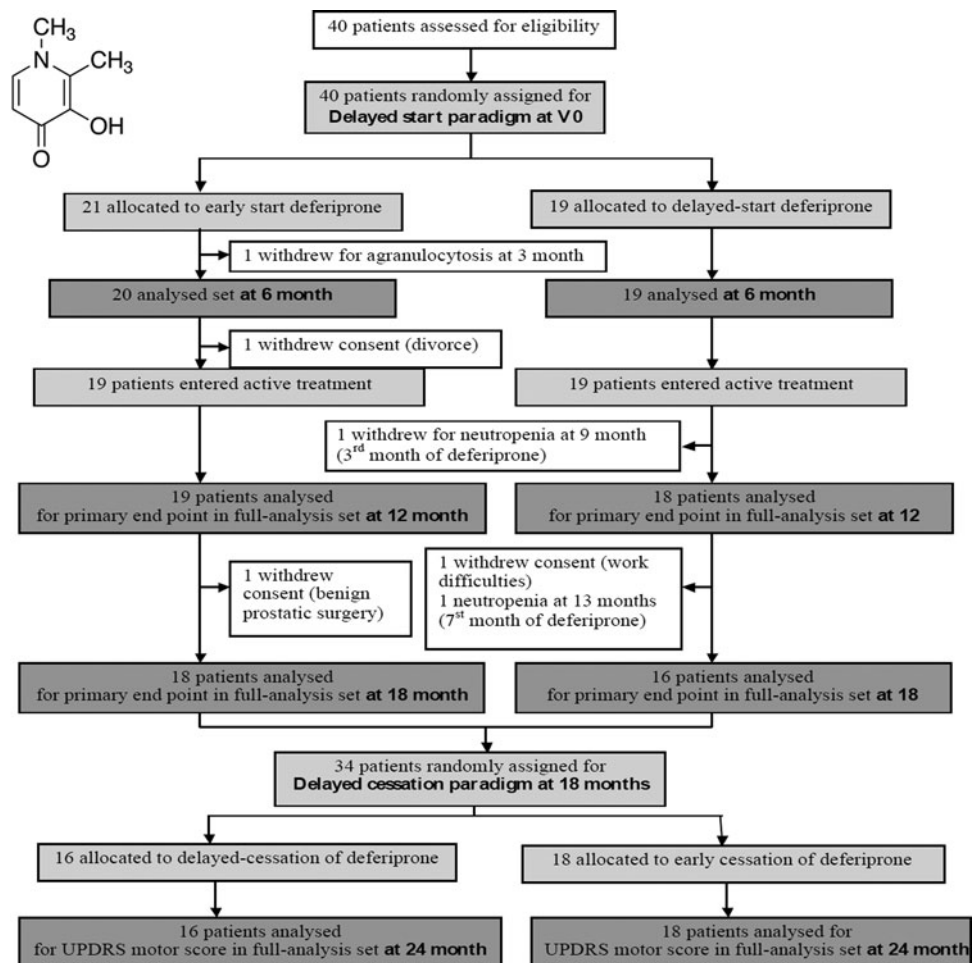

**SUPPLEMENTARY FIG. S1. Flowchart: patient disposition in the randomized clinical trial.** Structure of the bidentate iron chelator deferiprone (DFP).
