# Supplementary material
Source: PubMed Central journal article supplement (PMC4060813)
Supplement: Supp_Fig2.pdf [file Supp_Fig2.pdf]

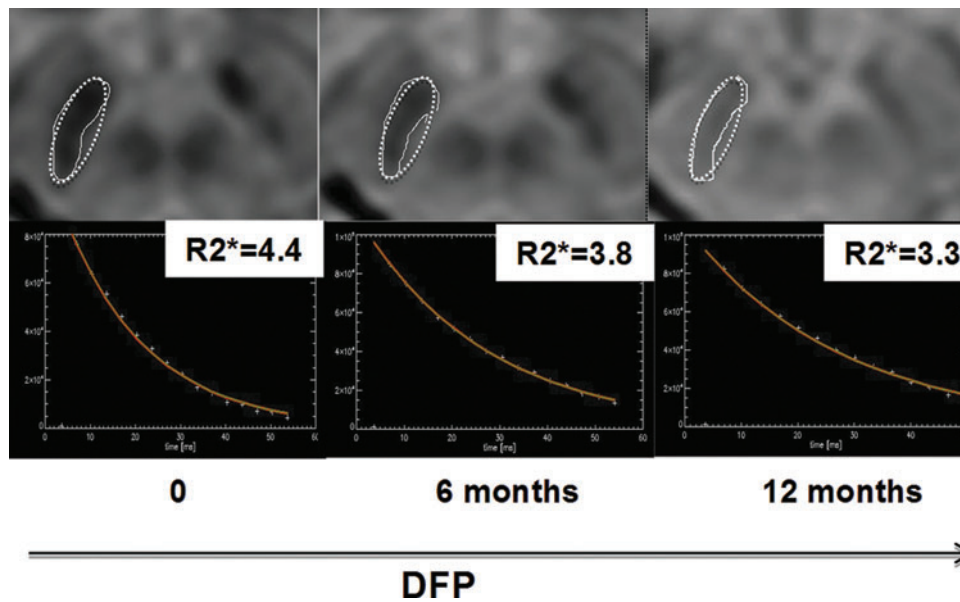

**SUPPLEMENTARY FIG. S2. Representative magnetic resonance imaging images from one patient from the early-start group during the first 12 months of treatment.** The region of interest (delineated by the thin solid line) corresponding to the substantia nigra (delineated by a broken line) was used to calculate  $R2^*$  from  $T2^*$  ( $R2^* = 1/T2^* (\text{ms}^{-1}) \times 10^3$ ) on the basis of representative relaxation plots at the indicated time points.
