# Supplementary material
Source: PubMed Central journal article supplement (PMC4060813)
Supplement: Supp_Table1.pdf [file Supp_Table1.pdf]

SUPPLEMENTARY TABLE S1. NEUROLOGICAL PROPERTIES OF THE PATIENTS ON STUDY ENTRY  
(THERE WERE NO SIGNIFICANT BETWEEN-GROUP DIFFERENCES)

|                                                                     | <i>Delayed-start group</i> | <i>Early-start group</i> | <i>p value</i> |
|---------------------------------------------------------------------|----------------------------|--------------------------|----------------|
| Number of patients                                                  | 19                         | 21                       |                |
| Age at study entry (years)                                          | 60 [54–64]                 | 61 [54–66]               | 0.7            |
| Gender ratio                                                        | 6 F/13 M                   | 9 F/12 M                 | —              |
| Time since diagnosis (years)                                        | 2 [1–3]                    | 2 [1–3]                  | 0.9            |
| Hoehn and Yahr stage (range, 1–5)                                   | 2 [1.5–2]                  | 2 [1.5–2]                | 0.85           |
| Daily L-dopa dose equivalent (mg)                                   | 300 [162–510]              | 300 [150–532]            | 0.87           |
| Number of patients on L-dopa                                        | 9                          | 10                       | —              |
| Patients on dopaminergic agonists (mean mg daily L-dopa equivalent) | 18 (243)                   | 18 (220)                 | 0.64           |
| Number of patients with L-dopa and agonists                         | 7                          | 7                        | —              |
| Number of patients on rasagiline                                    | 3                          | 3                        | —              |
| Mini mental scale examination score                                 | 29 [28–30]                 | 28 [26–30]               | 0.58           |
| Mattis dementia rating scale score                                  | 139 [138–141]              | 139 [134–143]            | 0.54           |
| Epworth Sleepiness Scale score                                      | 9 [7–13]                   | 9 [5–13]                 | 0.81           |
| Montgomery asberg depression rating scale                           | 3 [2–4]                    | 4 [2–5]                  | 0.74           |
| Cognition and behavior: MDS-UPDRS part I score                      | 6 [5–8]                    | 6 [4.7–9]                | 0.94           |

The dopaminergic drug treatments did not change over the course of the study.
