# Supplementary material
Source: PubMed Central journal article supplement (PMC4060813)
Supplement: Supp_Table2.pdf [file Supp_Table2.pdf]

SUPPLEMENTARY TABLE S2. BIOCHEMICAL AND HEMATOLOGICAL PARAMETERS OF PATIENTS AND HEALTHY CONTROLS ON STUDY ENTRY

|                                                  | <i>Controls</i>     | <i>PD patients</i>  | <i>p value</i> |
|--------------------------------------------------|---------------------|---------------------|----------------|
| Patients ( <i>n</i> =all analyses; only CSF)     | ( <i>n</i> =40; 20) | ( <i>n</i> =40; 20) |                |
| Age (years)                                      | (62) [58–66]        | (61) [54–65]        | 0.3            |
| Gender ratio (female/male)                       | (0.8)               | (0.6)               | 0.49           |
| Brain iron content (from R2* MRI sequence)       |                     |                     |                |
| Substantia nigra                                 | 3.98 [3.7–4.1]      | 4.54 [4.3–4.9]      | 0.0001         |
| Putamen                                          | 2.87 [2.8–3.1]      | 3.29 [3.1–3.5]      | 0.0001         |
| Caudate                                          | 3 [2.8–3.2]         | 2.9 [2.7–3.1]       | 0.3            |
| Pallidum                                         | 4 [3.7–4.7]         | 4.3 [4–4.6]         | 0.25           |
| Iron metabolic parameters                        |                     |                     |                |
| Ferritin (ng/ml) in CSF                          | 4 [3–5]             | 6 [5–7]             | 0.002          |
| Ferritin (ng/ml) in plasma                       | 93 [52–124]         | 71 [33–108]         | 0.6            |
| Iron in CSF ( $\mu\text{g/L}$ )                  | 21 [18–25]          | 20 [16–24]          | 0.4            |
| Sideruria ( $\mu\text{g}/24\text{ h}$ )          | 4 [2–8]             | 4 [3–7]             | 0.6            |
| Oxidation parameters. CSF                        |                     |                     |                |
| Malonaldehyde ( $\mu\text{M}$ )                  | 0.025 [0.02–0.04]   | 0.04 [0.028–0.043]  | 0.003          |
| 8 oxodG (pg/ml)                                  | 134 [118–231]       | 273 [216–306]       | 0.01           |
| Carbonylated proteins (pmol/mg)                  | 611 [530–687]       | 722 [632–908]       | 0.002          |
| Oxidation parameters. Plasma                     |                     |                     |                |
| Malonaldehyde ( $\mu\text{M}$ )                  | 0.8 [0.7–0.9]       | 0.9 [0.7–1]         | 0.7            |
| 8 oxodG (pg/ml)                                  | 133 [30–251]        | 151 [91–219]        | 0.3            |
| Carbonylated proteins ( $\mu\text{mol/g prot}$ ) | 3 [2.6–3.3]         | 4.1 [3–4.9]         | 0.01           |
| Antioxidant enzymes. CSF                         |                     |                     |                |
| Glutathione peroxidase (U/L)                     | 38 [35–41]          | 32 [26–36]          | 0.02           |
| Superoxide dismutase (U/L)                       | 0.89 [0.8–0.92]     | 0.74 [0.58–0.83]    | 0.01           |
| Antioxidant enzymes. Plasma                      |                     |                     |                |
| Glutathione peroxidase (U/g)                     | 56 [47–63]          | 51 [47–61]          | 0.08           |
| Superoxide dismutase (U/g)                       | 1300 [1119–1544]    | 1132 [1048–1276]    | 0.11           |
| Antioxidant status (mM)                          | 1.47 [1.4–1.62]     | 1.53 [1.44–1.61]    | 0.3            |
| Ceruloplasmin (g/L)                              | 0.30 [0.26–0.36]    | 0.27 [0.25–0.31]    | 0.1            |

The baseline parameters (expressed as the median [1st quartile–3rd quartile]) were compared with values from an age- and gender-matched control population in a Mann–Whitney test.

CSF, cerebrospinal fluid; MRI, magnetic resonance imaging; 8-oxodG, 8-oxo-7,8-dihydro-2'-deoxyguanosine.
