# Supplementary material
Source: PubMed Central journal article supplement (PMC4060813)
Supplement: Supp_Table3.pdf [file Supp_Table3.pdf]

SUPPLEMENTARY TABLE S3. HEMATOLOGICAL AND BIOCHEMICAL PARAMETERS FOLLOWING DFP TREATMENT, EXPRESSED AS THE MEDIAN [1ST QUARTILE–3RD QUARTILE]

| Patients' number (n, m) | Delayed-start group (month) |                  |                  | Early-start group (month) |                  |                  | p, months 6 vs. 12 |
|-------------------------|-----------------------------|------------------|------------------|---------------------------|------------------|------------------|--------------------|
|                         | Baseline (n = 19)           | (6) (n = 19)     | (12) (n = 18)    | Baseline (n = 21)         | (6) (n = 20)     | (12) (n = 19)    |                    |
| Weight (kg)             | 80 [71–87]                  | 79 [71–87]       | 82 [71–86]       | 81 [77–87]                | 83 [79–90]       | 83 [79–93]       | 0.30; 0.08         |
| Blood cell profile      |                             |                  |                  |                           |                  |                  |                    |
| Leukocytes ( $10^9/L$ ) | 5.9 [5.4–6.6]               | 6.1 [5.1–7]      | 5.2 [4.7–5.8]    | 6.4 [5.5–7.3]             | 5.6 [4.9–6.5]    | 5.2 [4.4–6.4]    | 0.10; 0.90         |
| Neutrophil ( $10^9/L$ ) | 4 [3.1–4.9]                 | 3.7 [3.1–4.6]    | 3.4 [2.8–3.8]    | 4.05 [3.6–4.9]            | 3.7 [2.9–4.3]    | 3.1 [2.7–4]      | 0.50; 0.80         |
| Hemoglobin (g/dl)       | 14.5 [13.9–15.3]            | 14.8 [13.8–15]   | 14.4 [13.7–15.2] | 14.3 [13.3–15.2]          | 13.7 [13.1–15.1] | 14 [13–14.6]     | 0.20; 0.20         |
| RBCs ( $10^{12}/L$ )    | 4.8 [4.6–4.9]               | 4.8 [4.6–4.9]    | 4.8 [4.5–5]      | 4.7 [4.5–5]               | 4.7 [4.5–4.9]    | 4.7 [4.6–4.9]    | 0.70; 0.30         |
| Reticulocytes (%)       | 1 [0.74–1.27]               | 0.97 [0.78–1.08] | 0.95 [0.73–1.2]  | 1.26 [1.04–1.45]          | 1.20 [0.99–1.49] | 1.24 [0.9–1.52]  | 0.06; 0.7          |
| MCV ( $10^{15}/L$ )     | 89.6 [88.2–93.4]            | 90 [88.4–93.5]   | 90.8 [87.9–93.5] | 89.7 [88.5–90.7]          | 89.6 [86.7–91.3] | 89.3 [86.9–91.5] | 0.70; 0.20         |
| MCHC (g/dl)             | 33.7 [33.5–34.2]            | 33.6 [33.2–34.1] | 32.8 [32.5–33.9] | 33.7 [33.2–34.3]          | 33.3 [32.6–33.9] | 33.2 [33–33.5]   | 0.09; 0.90         |
| MCH (pg/cell)           | 30.4 [29.6–31.2]            | 30.5 [29.8–31.1] | 30.5 [29.3–30.9] | 30.3 [29.3–30.7]          | 29.7 [28.5–31]   | 29.6 [28.8–30.4] | 0.10; 0.40         |
| Platelets ( $10^9/L$ )  | 239 [214–262]               | 237 [197–286]    | 212 [192–239]    | 223 [196–280]             | 227 [186–246]    | 228 [175–243]    | 0.06; 0.60         |
| Hematocrit (%)          | 42.9 [41.4–44.7]            | 43.5 [41.5–44.7] | 43.5 [42.2–44.6] | 41.9 [40.4–45.4]          | 40.7 [39–43.2]   | 42 [39.7–43.8]   | 0.40; 0.051        |
| Metal parameters        |                             |                  |                  |                           |                  |                  |                    |
| Plasma                  | (n = 19)                    | (n = 19)         | (n = 18)         | (n = 21)                  | (n = 20)         | (n = 19)         |                    |
| Iron ( $\mu g/L$ )      | 105 [75–111]                | 87 [77–106]      | 93 [81–103]      | 93 [77–131]               | 104 [87–117]     | 86 [77–142]      | 0.2; 0.5           |
| Tf sat. (%)             | 24 [16–29]                  | 22 [18–27]       | 23 [17–31]       | 26 [23–31]                | 26 [23–33]       | 20 [17–33]       | 0.1; 0.4           |
| Zinc ( $\mu g/dl$ )     | 70 [61–79]                  | 79 [75–84]       | 75 [69–82]       | 75 [70–84]                | 75 [71–85]       | 77 [74–84]       | 0.2; 0.7           |
| Copper ( $\mu g/dl$ )   | 95 [86–108]                 | 101 [89–114]     | 98 [91–115]      | 108 [94–120]              | 114 [92–124]     | 114 [103–124]    | 0.9; 0.2           |
| Urine ( $\mu g/24 h$ )  | (n = 19)                    | (n = 19)         | (n = 18)         | (n = 21)                  | (n = 20)         | (n = 19)         |                    |
| Zinc                    | 274 [184–469]               | 221 [121–370]    | 305 [221–362]    | 340 [228–430]             | 257 [142–634]    | 397 [247–453]    | 0.9; 0.9           |
| Copper                  | 13 [10–18]                  | 11 [7–18]        | 12 [9–17]        | 17 [11.5–20]              | 11 [7–17]        | 12 [8–17]        | 0.2; 0.9           |
| Iron                    | 4 [3–7]                     | 4 [3–7]          | 36 [21–58]       | 4 [3–7]                   | 34 [21–56]       | 51 [19–78]       | 0.001; 0.2         |
| CSF ( $\mu g/L$ )       | (m = 10)                    | (m = 10)         | —                | (m = 10)                  | (m = 10)         | —                |                    |
| Iron                    | 20 [18–24]                  | 21 [18–25]       | —                | 20.5 [18–25]              | 20 [18–22]       | —                | 0.9; 0.3           |
| Zinc                    | 40.5 [39–43]                | 38.5 [35–40]     | —                | 38 [35–44]                | 40.5 [36–43]     | —                | 0.2;               |
| Copper                  | 21 [16–27.5]                | 19.5 [14.5–24]   | —                | 20 [18–28]                | 19.5 [15–23]     | —                | 0.2;               |

Ranges are indicated in brackets. Covariance analysis adjusted for baseline is given as *p*-values for month 6 and 12. An essentially similar picture was obtained for the DC group at 24 months (data not shown). In the early-start group (which was treated for 18 months with DFP), the mean  $\pm$  SD (*n* = 18) serum levels for aspartic transaminase (AST), alanine transaminase (ALT), alkaline phosphatase (AP), total bilirubin (BLR), and gamma glutamyl transferase (GGT) were not statistically different at entrance versus end of DFP treatment (18 months), respectively: ALT:  $23.2 \pm 4.6$  versus  $23.7 \pm 4.2$ ; AST  $21.8 \pm 7.6$  versus  $22.1 \pm 7.0$ ; ALP:  $164 \pm 40$  versus  $155 \pm 54$ ; BLR:  $4.5 \pm 1.3$ ; and GGT:  $27.6 \pm 8.7$  versus  $31.2 \pm 10.0$ . DFP, deferrone; MCV, mean corpuscular volume; MCH, mean corpuscular hemoglobin (per cell); MCHC, mean corpuscular hemoglobin concentration.
