# Supplementary material
Source: PubMed Central journal article supplement (PMC4060813)
Supplement: Supp_Table4.pdf [file Supp_Table4.pdf]

SUPPLEMENTARY TABLE S4. 18-MONTH FAIRPARK CLINICAL TRIAL

| Month                | Delayed-start group |                         |                           |                          | Early-start group |                          |                          |                          |
|----------------------|---------------------|-------------------------|---------------------------|--------------------------|-------------------|--------------------------|--------------------------|--------------------------|
|                      | Baseline<br>19      | 6<br>19                 | 12<br>18                  | 18<br>16                 | Baseline<br>21    | 6<br>20                  | 12<br>19                 | 18<br>18                 |
| No of patients       | 24 [18.5-27]        | 24 [22-28.5]            | 22 [20.5-27]              | 23 [20-26]               | 23.5 [19.5-27.5]  | 22 [17-25]               | 22 [17-26]               | 22.5 [17-26.8]           |
| UPDRS motor score    | (23 ± 7)            | (24 ± 6)<br>+1.0 ± 0.73 | (22.8 ± 6)<br>-0.11 ± 0.7 | (23.4 ± 7)<br>+1.0 ± 0.7 | (23.9 ± 7)        | (21.6 ± 8)<br>-2.3 ± 0.6 | (21.3 ± 8)<br>-2.1 ± 0.5 | (21.5 ± 8)<br>-1.4 ± 0.5 |
| Change from baseline | —                   |                         |                           |                          | —                 |                          |                          |                          |
| Change over first    |                     |                         | -1.9 ± 0.3                |                          |                   |                          |                          |                          |
| 6 mo DFP treatment   |                     |                         |                           | +0.67 ± 0.20             |                   |                          |                          | +0.6 ± 0.2               |
| Change over last     |                     |                         |                           |                          |                   |                          |                          |                          |
| 6 mo DFP treatment   |                     |                         |                           |                          |                   |                          |                          |                          |

The results of the 18-month FAIRPARK clinical trial of DFP (see Table 1) were further analyzed as a function of the changes in the UPDRS motor score from baseline or over 6-month (mo) periods. The patients in the early-start group received DFP for 18 months [between month 0 (baseline) and month 18], whereas the patients in the delayed-start group received DFP only for 12 months (between months 6 and 18). The UPDRS motor scores are expressed as the median [1st quartile-3rd quartile] and (in brackets) the mean ± SD. A covariance analysis of the mean change from baseline yielded *p*-values and effect size values (in brackets) of 0.002 (-1.1), 0.03 (-0.8), and 0.01 (-0.9) for months 6, 12, and 18, respectively. The covariance analyses of changes over specific 6-month periods of DFP treatment (*i.e.*, the first period comparing months 0-6 for the ES group with months 6-12 for the DS group and last period comparing months 12-18 for both the ES and DS groups) showed that there were no significant intergroup differences.
