# Supplementary material
Source: PubMed Central journal article supplement (PMC4060813)
Supplement: Supp_Table5.pdf [file Supp_Table5.pdf]

SUPPLEMENTARY TABLE S5. THE DFP CESSATION PARADIGM

| <i>Treatment</i>                         | <i>Early-cessation group</i> |                       | <i>Delayed-cessation group</i> |                       |
|------------------------------------------|------------------------------|-----------------------|--------------------------------|-----------------------|
| Month analyzed<br>( <i>n</i> = patients) | 18 ( <i>n</i> = 16)          | 24 ( <i>n</i> = 16)   | 18 ( <i>n</i> = 18)            | 24 ( <i>n</i> = 18)   |
| UPDRS motor score                        | 22.5 [17.5–27] (23.2 ± 8)    | 24 [20–30] (25.2 ± 8) | 24 [19–27] (22.7 ± 7)          | 25 [19–28] (23.7 ± 7) |
| Change (18–24 months)                    | —                            | + 1.94 ± 0.87         | —                              | + 1 ± 0.82            |

All 34 patients having completed the initial 12-month study entered a 12-month extension phase in which DFP treatment was continued until month 18, at which point they were randomly divided into two groups of patients: one group ceased DFP treatment at 18 month and another continued the treatment until month 24 (the end of the study). The UPDRS motor scores assessed at month 18 and 24 are expressed as the median [1st quartile–3rd quartile], whereas the mean ± SD values are given in brackets. Covariance analyses were adjusted for baseline at month 18.
